# Supplementary material for: Targeted Neuronal Stimulation Modulates Working Memory via Astrocytic Interactions: Insights from a Spiking Neuron-Astrocyte Model
Source: Research Square preprint supplement (doi:10.21203/rs.3.rs-7065469/v1), 2025-07-08
Supplement: Supplementary file 1 [file e74afc9f54eb877268c46c8f.docx]

# Supplementary Materials


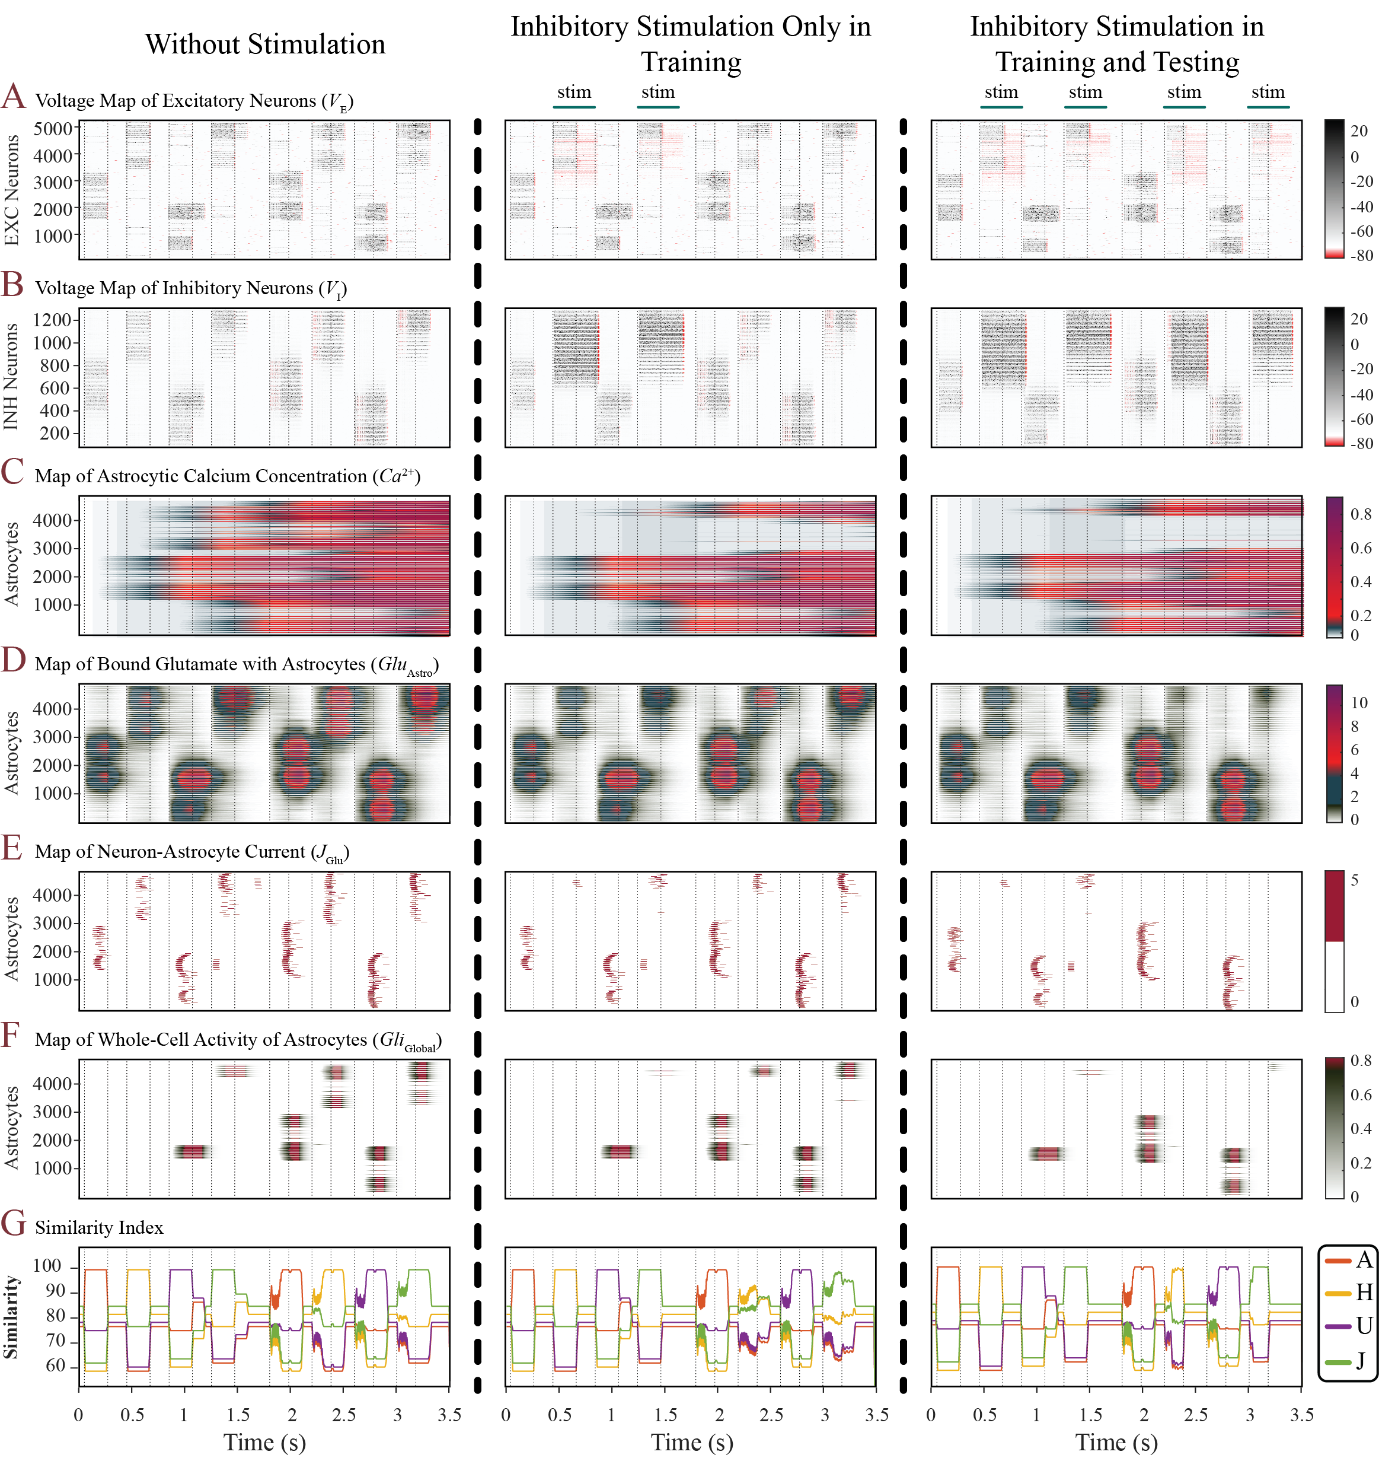


**Figure S1: Activity Maps of Key Model Variables in Experiment 2 for Working Memory Disruption.** Inhibitory stimulation diminishes working memory (WM) performance across all variables. As the iteration of inhibitory stimulation increases from “only in train” to “both train and test”, the performance of all activity maps further diminishes.


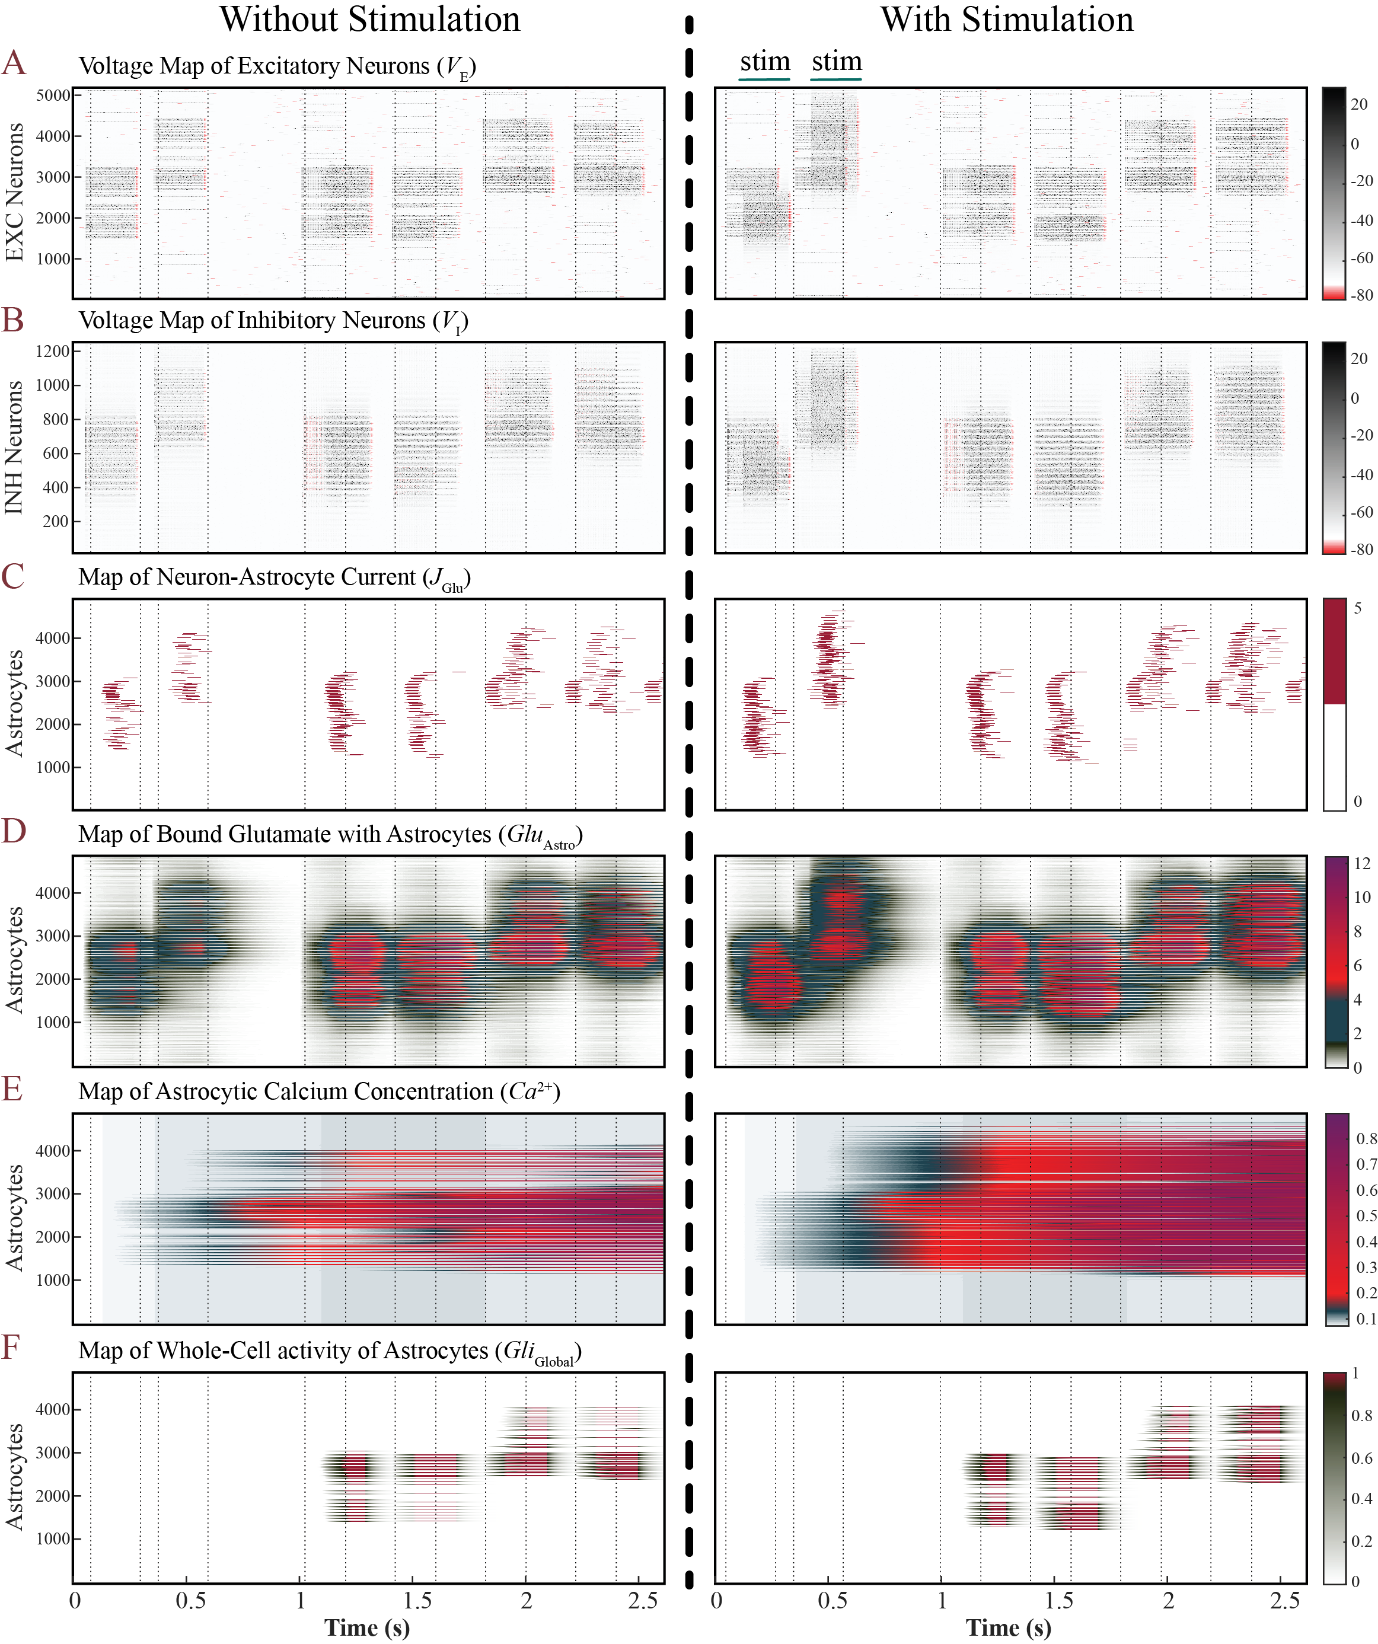


**Figure S2: Activity Maps of Key Model Variables in Experiment 3 for Working Memory Augmentation.** Excitatory stimulation enhances WM performance across all variables.

**Table S1.** Neural network parameters.

| Parameter | Description | Value |
| --- | --- | --- |
|  | Grid size of the excitatory neural network. | 71 71 |
|  | Grid size of the inhibitory neural network. | 35 35 |
|  | Time scale of the recovery variable. | 0.1 |
|  | The recovery variable’s sensitivity to the sub-threshold fluctuations of the membrane potential. | 0.2 |
|  | Post-spike membrane potential reset level. | *m*V |
|  | Post-spike reset point of the recovery variable. | 2 |
|  | Synaptic weight within excitatory synapses. | 0.015 |
|  | Synaptic weight between excitatory-inhibitory synapses. | 0.1 |
|  | Synaptic weight between inhibitory-excitatory synapses. | 0.15 |
|  | Strength of astrocyte-mediated synaptic weight modulation. | 25 |
|  | Synaptic reversal potential for excitatory synapses. | 0 *m*V |
|  | Synaptic reversal potential for Inhibitory synapses. | -90 *m*V |
|  | Slope of the synaptic activation function. | 0.2 *m*V |
|  | Number of efferent (outward) connections per presynaptic neuron within the excitatory network. | 40 |
|  | Number of efferent connections per presynaptic excitatory neuron to the inhibitory network. | 10 |
|  | Number of efferent connections per presynaptic inhibitory neuron to the excitatory network. | 30 |
|  | The mean of the exponential distribution of synaptic connection distances within the excitatory network. | 4 |
|  | The mean of the exponential distribution of synaptic connection distances from excitatory to inhibitory neurons. | 2 |
|  | The mean of the exponential distribution of synaptic connection distances from inhibitory to excitatory neurons. | 3 |
|  | Glutamate clearance rate. | 0.1 |
|  | Glutamate release rate operating with SoI. | 450 M s-1 |

**Table S2.** Astrocyte network parameters.

| Parameter | Description | Value |
| --- | --- | --- |
|  | Size of astrocytic network grid. | 70 70 |
|  | Cytosolic Ca2+ concentration. | 2.0 M |
|  | ER-to-cytosol volume ratio. | 0.185 |
|  | Max Ca2+ channel flux. | 6 s-1 |
|  | Ca2+ leak flux constant. | 0.11 s-1 |
|  | Maximum Ca2+ uptake rate. | 2.2 M s-1 |
|  | Maximum IP3 production rate. | 0.3 M s-1 |
|  | Maximum rate of activation-dependent calcium influx. | 0.2 M s-1 |
|  | Ca2+ extrusion rate constant. | 0.5 s-1 |
|  | Half-saturation constant for agonist-dependent calcium entry. | 1 M |
|  | ATP-Ca2+ pump activation constant. | 0.1 M |
|  | Dissociation constant for Ca2+ stimulation of IP3 production. | 1.1 M |
|  | IP3 dissociation constant. | 0.13 M |
|  | Dissociation constant for Ca2+ inhibition. | 1.049 M |
|  | IP3 receptor dissociation constant. | 943.4 *n*M |
|  | Ca2+ activation constant. | 82 *n*M |
|  | - | 0.8 |
|  | Rate constant for loss of IP3. | 0.14 s-1 |
|  | Steady state concentration of IP3. | 0.16 M |
|  | Ca2+ diffusion rate. | 0.05 s-1 |
|  | IP3 diffusion rate. | 0.05 s-1 |
|  | Efficacy of the Ca2+ depletion for whole-cell astrocytic activity. | 0.1 |

**Table S3.** Neuron-astrocyte bidirectional interaction parameters.

| Parameter | Description | Value |
| --- | --- | --- |
|  | Number of neurons interacting with a single astrocyte. | 4, 2 2 |
|  | IP3 production rate through the released neurotransmitter. | 5 M s-1 |
|  | IP3 production duration through the released neurotransmitter. | 60 *m*s |
|  | Threshold of astrocyte-bound glutamate required to trigger IP3-mediated mechanisms of memory encoding. |  |
|  | Threshold of astrocyte-bound glutamate required to initiate astrocyte whole-cell activity associated with recall in working memory. |  |
|  | Required Ca2+ concentration to initiate whole-cell activity (gliotransmitter release) for WM mechanism. | 0.15 M |
|  | Extension of the working memory time window () beyond the time point . | 100 *m*s |
|  | Gliotransmitter clearance rate. | 0.1 s-1 |
|  | Gliotransmitter release rate. | 15 M s-1 |

**Table S4.** Input layer parameters.

| Parameter | Description | Value |
| --- | --- | --- |
|  | Rate of background activity. | 1.4 Hz |
|  | Amplitude of current for input patterns during training phase. | 12 |
|  | Duration of current for input patterns during training phase. | 220 *m*s |
| - | Standard deviation of noise added to training samples. | 2 % |
|  | Amplitude of current for input patterns during testing phase. | 8 |
|  | Duration of current for input patterns during testing phase. | 200 *m*s |
| - | Standard deviation of noise added to test stimuli. | 5 % |
|  | Amplitude of current for background noise activity. | 5 |

**Table S5.** Recording and stimulating electrodes parameters.

| Parameter | Description | Value |
| --- | --- | --- |
|  | Excitatory stimulation amplitude. | 20 |
|  | Inhibitory stimulation amplitude. | 50 |
|  | Duration of excitatory stimulation for WM enhancement in experiment 1. | 400 *m*s |
|  | Duration of inhibitory stimulation for WM disruption in experiment 2. | 200 *m*s |
|  | Duration of excitatory stimulation for WM augmentation in experiment 3. | 200 *m*s |
|  | Number of recording electrodes. | 64, 8 8 |
|  | Number of stimulating electrodes. | 16, 4 4 |
|  | Spatial extent of Gaussian function for sensitivity of recording electrodes. | 2.5 |
|  | Spatial extent of Gaussian function for sensitivity of stimulating electrodes. | 5.5 |
|  | X-axis offset of electrode positions from the edges. | 2.5 |
|  | Y-axis offset of electrode positions from the edges. | 2.5 |
